# Supplementary material for: Patient-Level and Center-Level Factors Associated with Required Predonation Weight Loss among Obese Living Kidney Donors
Source: PubMed Central journal article supplement — Kidney360. 2024 Feb 6;5(3):437–44. doi: 10.34067/KID.0000000000000381 (PMC11000741; doi:10.34067/kid.0000000000000381), 2024-02-06
Supplement: kidney360-5-437-s001.pdf [file kidney360-5-437-s001.pdf]

# Supplemental Materials

## Patient and Center Level Factors Associated with Required Pre-donation Weight Loss among Obese Living Kidney Donors

Jackson Perry, M. Chandler McLeod, Rhiannon D. Reed, Gavin A. Baker, Luke A. Stanford, Joshua Allen, Bernarez Jones, Tayana Robinson, Paul A. MacLennan, Vineeta Kumar, Jayme E. Locke

<sup>1</sup>University of Alabama Comprehensive Transplant Institute, Birmingham, Alabama

### Table of Contents

| Name                 | Title                                          |
|----------------------|------------------------------------------------|
| Supplemental Methods |                                                |
| Table S1             | Transplant centers                             |
| Table S2             | Preop BMI by decade of donation                |
| Table S3             | Pooled model results after multiple imputation |

## SUPPLEMENTAL METHODS

We chose to complement our analysis with multiple imputation, as data were missing for a large number of medical records contributing to identification of metabolic disease. Multiple imputation using chained equations was implemented to account for missing values under the assumption that data were missing at random. Fifty total datasets were imputed using patient preoperative information (whether required to lose weight, BMI, transplant year, age, race, creatinine, systolic blood pressure, diastolic blood pressure, triglycerides, HDL, elevated fasting blood glucose, hypertension) and transplant center characteristics (percent of kidney donations that were living donor by year, median BMI of living donors by year, and transplant center code). Metabolic disease count was recalculated after imputing component factors. Estimates were pooled using Rubin's Rules.

Table S1. Transplant centers

| Characteristic       | Required to Lose<br>Weight (N=340) | Not Required to Lose<br>Weight (N=757) | Total<br>(N=1097) | p<br>value |
|----------------------|------------------------------------|----------------------------------------|-------------------|------------|
| Transplant<br>Center |                                    |                                        |                   | 0.004      |
| ALUA                 | 27 (22.3%)                         | 94 (77.7%)                             | 121<br>(100.0%)   |            |
| CACS                 | 1 (33.3%)                          | 2 (66.7%)                              | 3<br>(100.0%)     |            |
| CAPM                 | 6 (35.3%)                          | 11 (64.7%)                             | 17<br>(100.0%)    |            |
| CASF                 | 10 (52.6%)                         | 9 (47.4%)                              | 19<br>(100.0%)    |            |
| CASH                 | 0 (0.0%)                           | 2 (100.0%)                             | 2<br>(100.0%)     |            |
| CASM                 | 2 (50.0%)                          | 2 (50.0%)                              | 4<br>(100.0%)     |            |
| CAUC                 | 0 (0.0%)                           | 3 (100.0%)                             | 3<br>(100.0%)     |            |
| COUC                 | 6 (50.0%)                          | 6 (50.0%)                              | 12<br>(100.0%)    |            |
| CTYN                 | 9 (56.2%)                          | 7 (43.8%)                              | 16<br>(100.0%)    |            |
| FLJM                 | 5 (38.5%)                          | 8 (61.5%)                              | 13<br>(100.0%)    |            |
| FLTG                 | 8 (40.0%)                          | 12 (60.0%)                             | 20<br>(100.0%)    |            |
| GAEM                 | 18 (50.0%)                         | 18 (50.0%)                             | 36<br>(100.0%)    |            |
| GAPH                 | 4 (25.0%)                          | 12 (75.0%)                             | 16<br>(100.0%)    |            |
| ILUI                 | 6 (23.1%)                          | 20 (76.9%)                             | 26<br>(100.0%)    |            |
| INIM                 | 6 (40.0%)                          | 9 (60.0%)                              | 15<br>(100.0%)    |            |
| LATU                 | 1 (25.0%)                          | 3 (75.0%)                              | 4<br>(100.0%)     |            |
| MAMG                 | 2 (28.6%)                          | 5 (71.4%)                              | 7<br>(100.0%)     |            |
| MDJH                 | 34 (33.7%)                         | 67 (66.3%)                             | 101<br>(100.0%)   |            |
| MDUM                 | 1 (100.0%)                         | 0 (0.0%)                               | 1<br>(100.0%)     |            |
| MIHF                 | 4 (19.0%)                          | 17 (81.0%)                             | 21<br>(100.0%)    |            |

|      |            |            |                |  |
|------|------------|------------|----------------|--|
| MISM | 5 (29.4%)  | 12 (70.6%) | 17<br>(100.0%) |  |
| MNHC | 4 (16.0%)  | 21 (84.0%) | 25<br>(100.0%) |  |
| MNMC | 22 (27.8%) | 57 (72.2%) | 79<br>(100.0%) |  |
| MNUM | 21 (38.9%) | 33 (61.1%) | 54<br>(100.0%) |  |
| MOBH | 7 (35.0%)  | 13 (65.0%) | 20<br>(100.0%) |  |
| NCDU | 3 (21.4%)  | 11 (78.6%) | 14<br>(100.0%) |  |
| NEUN | 6 (35.3%)  | 11 (64.7%) | 17<br>(100.0%) |  |
| NJSB | 13 (31.0%) | 29 (69.0%) | 42<br>(100.0%) |  |
| NYCP | 7 (31.8%)  | 15 (68.2%) | 22<br>(100.0%) |  |
| NYMS | 9 (34.6%)  | 17 (65.4%) | 26<br>(100.0%) |  |
| NYNY | 0 (0.0%)   | 2 (100.0%) | 2<br>(100.0%)  |  |
| NYWC | 0 (0.0%)   | 3 (100.0%) | 3<br>(100.0%)  |  |
| OHCC | 8 (30.8%)  | 18 (69.2%) | 26<br>(100.0%) |  |
| OHOU | 12 (21.4%) | 44 (78.6%) | 56<br>(100.0%) |  |
| OHTC | 4 (66.7%)  | 2 (33.3%)  | 6<br>(100.0%)  |  |
| OHUC | 3 (33.3%)  | 6 (66.7%)  | 9<br>(100.0%)  |  |
| OHUH | 2 (50.0%)  | 2 (50.0%)  | 4<br>(100.0%)  |  |
| ORGS | 0 (0.0%)   | 1 (100.0%) | 1<br>(100.0%)  |  |
| ORUO | 1 (7.7%)   | 12 (92.3%) | 13<br>(100.0%) |  |
| PAHE | 0 (0.0%)   | 1 (100.0%) | 1<br>(100.0%)  |  |
| PAPT | 6 (31.6%)  | 13 (68.4%) | 19<br>(100.0%) |  |
| PAUP | 1 (100.0%) | 0 (0.0%)   | 1<br>(100.0%)  |  |
| TNVU | 11 (29.7%) | 26 (70.3%) | 37<br>(100.0%) |  |
| TXHS | 15 (17.6%) | 70 (82.4%) | 85<br>(100.0%) |  |

|      |           |           |                |  |
|------|-----------|-----------|----------------|--|
| TXMH | 9 (81.8%) | 2 (18.2%) | 11<br>(100.0%) |  |
|------|-----------|-----------|----------------|--|

|      |            |            |                |  |
|------|------------|------------|----------------|--|
| TXSP | 1 (100.0%) | 0 (0.0%)   | 1<br>(100.0%)  |  |
| TXTX | 1 (33.3%)  | 2 (66.7%)  | 3<br>(100.0%)  |  |
| VAFH | 5 (41.7%)  | 7 (58.3%)  | 12<br>(100.0%) |  |
| VAHD | 1 (100.0%) | 0 (0.0%)   | 1<br>(100.0%)  |  |
| VANG | 4 (66.7%)  | 2 (33.3%)  | 6<br>(100.0%)  |  |
| VAUV | 1 (25.0%)  | 3 (75.0%)  | 4<br>(100.0%)  |  |
| WISL | 1 (100.0%) | 0 (0.0%)   | 1<br>(100.0%)  |  |
| WIUW | 7 (31.8%)  | 15 (68.2%) | 22<br>(100.0%) |  |

Table S2. Preop BMI by decade of donation

|                   |         | Required to Lose Weight                                  |         | Not Required to Lose Weight                            |         |
|-------------------|---------|----------------------------------------------------------|---------|--------------------------------------------------------|---------|
| Transplant Decade | N total | Preop BMI<br>[Mean kg/m <sup>2</sup><br>(SD)]<br>(N=340) | p-value | Preop BMI<br>[Mean kg/m <sup>2</sup> (SD)]<br>(N=1097) | p-value |
|                   |         |                                                          | 0.20    |                                                        | 0.13    |
| 1979 – 1989       | 7       | 30.8 (-)                                                 |         | 33.2 (1.9)                                             |         |
| 1990 – 1999       | 74      | 33.5 (2.0)                                               |         | 32.9 (2.8)                                             |         |
| 2000 – 2009       | 540     | 34.0 (3.3)                                               |         | 32.9 (2.9)                                             |         |
| >=2010            | 476     | 33.4 (2.8)                                               |         | 32.4 (2.1)                                             |         |

Table S3. Pooled model results after multiple imputation

|                                    | <b>Were required to lose weight prior to their donation, OR<br/>(95% CI)</b> | <b>P</b> |
|------------------------------------|------------------------------------------------------------------------------|----------|
| Transplant Year                    | 1.05 (1.03, 1.08)                                                            | <0.001   |
| Age                                | 1.00 (0.99, 1.02)                                                            | 0.65     |
| Race                               |                                                                              |          |
| (White)                            | 1.0                                                                          |          |
| (Black/African American)           | 0.83 (0.53, 1.31)                                                            | 0.43     |
| (Asian/Pacific Islander)           | 0.63 (0.18, 2.12)                                                            | 0.45     |
| (American Indian/Alaskan Native)   | 0.86 (0.06, 12.46)                                                           | 0.91     |
| (Other)                            | 1.21 (0.59, 2.44)                                                            | 0.60     |
| Gender (Female)                    | 0.97 (0.69, 1.37)                                                            | 0.86     |
| Percentage of Living Donations     | 0.99 (0.98, 1.00)                                                            | <0.05    |
| Creatinine                         | 1.02 (0.44, 2.35)                                                            | 0.97     |
| BMI                                | 1.14 (1.08, 1.21)                                                            | <0.001   |
| Median BMI of Center Living Donors |                                                                              |          |
| 20 - 25                            | 1.0                                                                          |          |
| 25 – 30]                           | 0.82 (0.38, 1.79)                                                            | 0.63     |
| 30 - 37]                           | 0.51 (0.10, 2.78)                                                            | 0.44     |
| Metabolic Disease Count            | 0.93 (0.78, 1.10)                                                            | 0.40     |
| History of Hypertension            | 1.62 (1.00, 2.65)                                                            | 0.05     |
| <b>n</b>                           | 1097                                                                         |          |
